# Supplementary material for: Associations between serum 25(OH)D concentrations and prevalent asthma among children living in communities with differing levels of urbanization: a cross-sectional study
Source: PubMed Central journal article supplement (PMC5457560; doi:10.1186/s40733-017-0033-2), 2017-06-02
Supplement: 40733_2017_33_MOESM1_ESM.pdf [file 40733_2017_33_MOESM1_ESM.pdf]

**ONLINE SUPPLEMENT**

**e-Table 1.** Sensitivity analysis of excluding previous asthma cases in multivariable logistic regression analysis of the association between 25-OH vitamin D levels and asthma.

|                                                      | <b>Adjusted* relationships with total serum 25(OH)D levels (per 10 ng/ml decrease)</b> |                          |                           |                          |                           |                          |
|------------------------------------------------------|----------------------------------------------------------------------------------------|--------------------------|---------------------------|--------------------------|---------------------------|--------------------------|
|                                                      | <b>Overall (n=884)</b>                                                                 |                          | <b>Atopy (n=603)</b>      |                          | <b>No Atopy (n=262)</b>   |                          |
|                                                      | <b>Pampas<br/>(n=419)</b>                                                              | <b>Villa<br/>(n=465)</b> | <b>Pampas<br/>(n=293)</b> | <b>Villa<br/>(n=310)</b> | <b>Pampas<br/>(n=118)</b> | <b>Villa<br/>(n=144)</b> |
| <b>Asthma</b>                                        | 1.18 (1.02 to 1.38)                                                                    | 0.954 (0.867 to 1.05)    | 1.18 (0.985 to 1.42)      | 0.925 (0.829 to 1.03)    | 1.07 (0.806 to 1.43)      | 1.06 (0.86 to 1.32)      |
|                                                      | 0.03                                                                                   | 0.33                     | 0.07                      | 0.16                     | 0.63                      | 0.59                     |
|                                                      | <b>(n=354)</b>                                                                         | <b>(n=385)</b>           | <b>(n=256)</b>            | <b>(n=257)</b>           | <b>(n=98)</b>             | <b>(n=128)</b>           |
| <b>Asthma<br/>(excluding<br/>previous<br/>cases)</b> | 1.45 (1.00 to 2.10)                                                                    | 0.857 (0.667 to 1.10)    | 1.34 (0.88 to 2.06)       | 0.799 (0.596 to 1.07)    | 1.37 (0.685 to 2.73)      | 1.00 (0.561 to 1.79)     |
|                                                      | 0.05                                                                                   | 0.23                     | 0.17                      | 0.13                     | 0.38                      | 0.99                     |
